# Supplementary material for: Genetics Reveal Long-Distance Virus Transmission Links in Pacific Salmon
Source: MDPI journal article supplement (doi:10.3390/ani12162120), 2022-08-18
Supplement: s1 [file s1]

Genetics reveal long-distance virus transmission links in Pacific salmon.  
Breyta, Batts, and Kurath

Table S1. Isolates of infectious hematopoietic necrosis virus (IHNV) from coastal Washington and Columbia River basin sites analyzed by full G sequencing.

| Isolate Name <sup>a</sup>                                                     | mGUSD <sup>b</sup> | Region <sup>c</sup> | Isolation site <sup>d</sup> | Site code | Species <sup>e</sup> | Run season | Month isolated | Day isolated | Year isolated | Fish age <sup>f</sup> | Disease Status <sup>g</sup> | fGUSD <sup>h</sup> |
|-------------------------------------------------------------------------------|--------------------|---------------------|-----------------------------|-----------|----------------------|------------|----------------|--------------|---------------|-----------------------|-----------------------------|--------------------|
| <b>2nd emergence, candidate source isolates from the Columbia River Basin</b> |                    |                     |                             |           |                      |            |                |              |               |                       |                             |                    |
| TC02StA*                                                                      | mG110M             | CRB                 | Tanner Creek                | TC        | Steelhead            | NA         | 5              | NA           | 2002          | Ad                    | dead                        | fG110M             |
| SH02StJa*                                                                     | mG110M             | CRB                 | Skamania H.                 | SH        | Steelhead            | summer     | 7              | 22           | 2002          | Juv                   | NA                          | fG143M             |
| SH02StJb                                                                      | mG110M             | CRB                 | Skamania H.                 | SH        | Steelhead            | summer     | 11             | 7            | 2002          | Juv                   | NA                          | fG143M             |
| LR04StA*                                                                      | mG110M             | CRB                 | Lewis River H.              | LR        | Steelhead            | summer     | 9              | 13           | 2004          | Ad                    | NA                          | fG129M/<br>fG157M  |
| EB04SkA*                                                                      | mG110M             | CRB                 | Eastbank H.                 | EB        | Sockeye              | NA         | 9              | 22           | 2004          | Ad                    | NA                          | fG130M             |
| KA04StJ*                                                                      | mG110M             | CRB                 | Kalama Falls H.             | KA        | Steelhead            | winter     | 9              | 22           | 2004          | Juv                   | NA                          | fG129M             |
| KA04ChA                                                                       | mG110M             | CRB                 | Kalama Falls H.             | KA        | Chinook              | fall       | 9              | 27           | 2004          | Ad                    | NA                          | fG129M             |
| EL04StJ*                                                                      | mG110M             | CRB                 | Elochoman H.                | EL        | Steelhead            | winter     | 10             | 6            | 2004          | Juv                   | NA                          | fG127M             |
| ME04StAa*                                                                     | mG110M             | CRB                 | Merwin H.                   | ME        | Steelhead            | summer     | 12             | 16           | 2004          | Ad                    | NA                          | fG152M             |
| ME04StAb                                                                      | mG110M             | CRB                 | Merwin H.                   | ME        | Steelhead            | winter     | 12             | 22           | 2004          | Ad                    | NA                          | fG129M             |
| SH08StJ*                                                                      | mG110M             | CRB                 | Skamania H.                 | SH        | Steelhead            | summer     | 10             | 9            | 2008          | Juv                   | NA                          | fG134M             |
| SH08StAa*                                                                     | mG110M             | CRB                 | Skamania H.                 | SH        | Steelhead            | summer     | 11             | 24           | 2008          | Ad                    | asyp                        | fG131M             |
| SH08StAb                                                                      | mG110M             | CRB                 | Skamania H.                 | SH        | Steelhead            | winter     | 12             | 16           | 2008          | Ad                    | asyp                        | fG134M             |
| SP09RbJ*                                                                      | mG110M             | CRB                 | Speelyai H.                 | SP        | Rainbow              | NA         | 1              | 12           | 2009          | Juv                   | NA                          | fG136M             |
| AB09StA*                                                                      | mG110M             | CRB                 | Abernathy Fish Tech. Ctr.   | AC        | Steelhead            | winter     | 4              | 27           | 2009          | Ad                    | NA                          | fG030M             |
| KA09StJ                                                                       | mG110M             | CRB                 | Kalama Falls H.             | KA        | Steelhead            | winter     | 9              | 18           | 2009          | Juv                   | NA                          | fG130M             |
| KA09ChA*                                                                      | mG110M             | CRB                 | Kalama Falls H.             | KA        | Chinook              | fall       | 9              | 29           | 2009          | Ad                    | NA                          | fG128M             |
| KA09StJ                                                                       | mG110M             | CRB                 | Kalama Falls H.             | KA        | Steelhead            | winter     | 10             | 22           | 2009          | Juv                   | NA                          | fG130M             |
| ME09StA*                                                                      | mG110M             | CRB                 | Merwin H.                   | ME        | Steelhead            | summer     | 11             | 30           | 2009          | Ad                    | NA                          | fG132M             |
| KA10StA                                                                       | mG110M             | CRB                 | Kalama Falls H.             | KA        | Steelhead            | winter     | 4              | 13           | 2010          | Ad                    | NA                          | fG127M             |

|                                                                               |        |       |                              |    |           |        |    |    |      |               |          |        |
|-------------------------------------------------------------------------------|--------|-------|------------------------------|----|-----------|--------|----|----|------|---------------|----------|--------|
| SH10StAa*                                                                     | mG110M | CRB   | Skamania H.                  | SH | Steelhead | winter | 7  | 26 | 2010 | Ad            | NA       | fG149M |
| SH10StAb*                                                                     | mG110M | CRB   | Skamania H.                  | SH | Steelhead | winter | 7  | 26 | 2010 | Ad            | NA       | fG150M |
| SH10StJa*                                                                     | mG110M | CRB   | Skamania H.                  | SH | Steelhead | winter | 8  | 24 | 2010 | Juv           | NA       | fG151M |
| SH10StJb                                                                      | mG110M | CRB   | Skamania H.                  | SH | Steelhead | winter | 8  | 24 | 2010 | Juv           | NA       | fG151M |
| <b>2nd emergence, Washington Coast sink isolates</b>                          |        |       |                              |    |           |        |    |    |      |               |          |        |
| SR07StJ*                                                                      | mG110M | Coast | Salmon River Tribal Fish H.  | SR | Steelhead | NA     | 5  | 16 | 2007 | Juv           | NA       | fG029M |
| HH08CoA                                                                       | mG110M | Coast | Humptulips H.                | HH | Coho      | NA     | 1  | 14 | 2008 | Ad            | NA       | fG127M |
| HH08StAa                                                                      | mG110M | Coast | Humptulips H.                | HH | Steelhead | winter | 1  | 28 | 2008 | Ad            | asypm    | fG127M |
| HH08StAb                                                                      | mG110M | Coast | Humptulips H.                | HH | Steelhead | winter | 1  | 28 | 2008 | Ad            | asypm    | fG127M |
| HH08StJ                                                                       | mG110M | Coast | Humptulips H.                | HH | Steelhead | winter | 3  | 11 | 2008 | Juv           | epidemic | fG127M |
| HH08RbJ                                                                       | mG110M | Coast | Humptulips H.                | HH | Rainbow   | NA     | 4  | 1  | 2008 | Juv           | epidemic | fG127M |
| LA08StJa                                                                      | mG110M | Coast | Lake Aberdeen H.             | LA | Steelhead | summer | 10 | 9  | 2008 | Juv           | NA       | fG127M |
| LA08StJb*                                                                     | mG168M | Coast | Lake Aberdeen H.             | LA | Steelhead | summer | 10 | 9  | 2008 | Juv           | NA       | fG135M |
| LQ09StY                                                                       | mG110M | Coast | Lake Quinault Tribal Fish H. | LQ | Steelhead | NA     | 1  | 21 | 2009 | year-<br>ling | dead     | fG127M |
| BC09StA                                                                       | mG168M | Coast | Bingham Creek H.             | BC | Steelhead | winter | 3  | 24 | 2009 | Ad            | NA       | fG135M |
| HH10StAa                                                                      | mG110M | Coast | Humptulips H.                | HH | Steelhead | summer | 1  | 4  | 2010 | Ad            | asypm    | fG127M |
| HH10StAb*                                                                     | mG110M | Coast | Humptulips H.                | HH | Steelhead | winter | 1  | 12 | 2010 | Ad            | asypm    | fG137M |
| QR11StA*                                                                      | mG110M | Coast | Quinault R., Tahola plant    | QR | Steelhead | winter | 1  | 3  | 2011 | Ad            | asypm    | fG141M |
| <b>3rd emergence, candidate source isolates from the Columbia River Basin</b> |        |       |                              |    |           |        |    |    |      |               |          |        |
| SH03CtA*                                                                      | mG139M | CRB   | Skamania H.                  | SH | Cutthroat | NA     | 12 | 16 | 2003 | Ad            | NA       | fG156M |
| SH05StJa*                                                                     | mG139M | CRB   | Skamania H.                  | SH | Steelhead | summer | 7  | 18 | 2005 | Juv           | NA       | fG147M |
| SH05StJb*                                                                     | mG139M | CRB   | Skamania H.                  | SH | Steelhead | winter | 7  | 18 | 2005 | Juv           | NA       | fG148M |
| DW08StA*                                                                      | mG139M | CRB   | Dworshak National Fish H.    | NF | Steelhead | winter | 3  | 25 | 2008 | Ad            | NA       | fG133M |
| NP08ChJ*                                                                      | mG139M | CRB   | Nez Perce Tribal Fish H.     | CR | Chinook   | spring | 7  | 21 | 2008 | Juv           | epidemic | fG142M |
| NP08ChJ                                                                       | mG139M | CRB   | Nez Perce Tribal Fish H.     | CR | Chinook   | spring | 7  | 21 | 2008 | Juv           | epidemic | fG133M |
| DW08ChA                                                                       | mG139M | CRB   | Dworshak National Fish H.    | NF | Chinook   | spring | 8  | 12 | 2008 | Ad            | NA       | fG133M |
| DW09StJ*                                                                      | mG139M | CRB   | Dworshak National Fish H.    | NF | Steelhead | winter | 6  | 26 | 2009 | Juv           | epidemic | fG139M |

| 3rd emergence, Washington Coast sink isolates |          |       |                              |    |           |        |    |    |      |     |          |          |
|-----------------------------------------------|----------|-------|------------------------------|----|-----------|--------|----|----|------|-----|----------|----------|
| BH09StA                                       | mG139M   | Coast | Bogachiel H.                 | BH | Steelhead | winter | 12 | 22 | 2009 | Ad  | NA       | fG139M   |
| HR10StA                                       | mG139M   | Coast | Hoh River                    | HR | Steelhead | winter | 3  | 9  | 2010 | Ad  | asympt   | fG133M   |
| LQ10StA                                       | mG139M   | Coast | Lake Quinault Tribal Fish H. | LQ | Steelhead | winter | 3  | 23 | 2010 | Ad  | NA       | fG133M   |
| QR10StA                                       | mG139M   | Coast | Quinault R., Tahola plant    | QR | Steelhead | winter | 3  | 30 | 2010 | Ad  | NA       | fG133M   |
| SR10StJ                                       | mG139M   | Coast | Salmon River Tribal Fish H.  | SR | Steelhead | winter | 4  | 14 | 2010 | Juv | NA       | fG133M   |
| LQ10StJ*                                      | mG139M   | Coast | Lake Quinault Tribal Fish H. | LQ | Steelhead | winter | 5  | 17 | 2010 | Juv | epidemic | fG138M   |
| LQ10StJ                                       | mG139M   | Coast | Lake Quinault Tribal Fish H. | LQ | Steelhead | winter | 7  | 6  | 2010 | Juv | asympt   | fG133M   |
| QN10StA                                       | mG139M   | Coast | Quinault National Fish H.    | QN | Steelhead | winter | 11 | 16 | 2010 | Ad  | asympt   | fG133M   |
| QN11StJ*                                      | mG139M   | Coast | Quinault National Fish H.    | QN | Steelhead | winter | 1  | 3  | 2011 | Juv | moribund | fG140M   |
| LQ11StA*                                      | mG139M** | Coast | Lake Quinault Tribal Fish H. | LQ | Steelhead | winter | 3  | 23 | 2011 | Ad  | NA       | fG133M** |

<sup>a</sup> asterisks indicate isolates with fullG sequences deposited into GenBank under the isolate name (without the asterisk), as representatives of each fGUSD sequence.

<sup>b</sup> mGUSD is the midG universal sequence designator used for primary IHNV genotyping, based on sequence of the 303 nt midG region in the IHNV glycoprotein gene.

<sup>c</sup> Region: CRB, Columbia River Basin; WA coast, Washington state coast. Double asterisk on mG139M indicates 2 sites of sequence heterogeneity.

<sup>d</sup> Location: H., hatchery. Full location names given here are abbreviated in the main text and figures of the paper as shown in the Site code column, with the following explanation of selected codes: Abernathy Fish Technology Center, AC; Tahola Processing plant, QR for Quinault River; Dworshak National Fish Hatchery, NF for North Fork; Nez Perce Tribal Fish Hatchery, CR for Clearwater River.

<sup>e</sup> Species: steelhead, steelhead trout (*Oncorhynchus mykiss*); sockeye, sockeye salmon (*O. nerka*); Chinook, Chinook salmon (*O. tshawytscha*); Rainbow, rainbow trout (*O. mykiss*); Coho, coho salmon, (*O. kisutch*); Cutthroat, cutthroat trout (*O. clarkii*).

<sup>f</sup> Ad, adult; Juv, juvenile

<sup>g</sup> asympt, asymptomatic

<sup>h</sup> fGUSD is the full G universal sequence designator based on the 1513 nt G gene coding sequences presented here (see methods). The USD fG129M/fG157M indicates a sequence with one nucleotide site of heterogeneity, and fG133M\*\* indicates two nucleotide sites of heterogeneity.

NA, not applicable or information not available
